# Supplementary material for: A simple fluorescence assay for the detection of fluoride in water at neutral pH
Source: Royal Society of Chemistry journal article supplement (doi:10.1039/c1cc10498e), 2011-01-01
Supplement: c1cc10498e.pdf [file c1cc10498e.pdf]

# Electronic Supplementary Information

## A simple fluorescence assay for the detection of fluoride in water at neutral pH

Sébastien Rochat and Kay Severin\*

*Institut des Sciences et Ingénierie Chimiques,*

*École Polytechnique Fédérale de Lausanne (EPFL), Lausanne, Switzerland.*

*Fax: +41(0)21 6939305; Tel: +41(0)21 6939302; E-mail: kay.severin@epfl.ch*

**1. General :** All reagents were commercially available and used as received:  $\text{CaCl}_2 \times 2\text{H}_2\text{O}$ , NaF, NaBr, NaI,  $\text{CH}_3\text{COONa} \times 3 \text{H}_2\text{O}$ ,  $\text{NaClO}_4 \times \text{H}_2\text{O}$ , NaCN,  $\text{Na}_2\text{CO}_3$ ,  $\text{NaNO}_2$ ,  $\text{NaNO}_3$ , NaSCN,  $\text{Na}_2\text{HPO}_4$ ,  $\text{Na}_2\text{H}_2\text{P}_2\text{O}_7$ , MOPS (Fluka), NaCl,  $\text{CaF}_2$  (Acros),  $\text{NaN}_3$ ,  $\text{Na}_2\text{SO}_4$ , BAPTA (Sigma-Aldrich). MOPS buffer (100 mM) was prepared with bidistilled  $\text{H}_2\text{O}$  and used for all experiments (the pH was adjusted to 7.0 by titration with KOH). Stock solution of calcium chloride (5.0 mM) and of BAPTA (2.5 mM) were prepared in 100 mM MOPS buffer. The BAPTA solution was stored at 4 °C and renewed after 1 week. Stock solutions of the sodium salts (10 or 100 mM) were prepared in bidistilled water. Toothpastes (Beverly Hills Formula<sup>®</sup> (BHF), Elmex<sup>®</sup> Green, Elmex<sup>®</sup> for kids, Meridol<sup>®</sup>, Signal<sup>®</sup> for kids) and mouthwashes (Colgate<sup>®</sup>, Elmex<sup>®</sup> Red, Meridol<sup>®</sup>) were purchased from local stores. Fluorescence measurements were recorded at 25 °C on a Varian Cary Eclipse spectrophotometer.

## **2. Procedure for the detection of fluoride in water :**

*Step 1 :* Stock solutions of  $\text{CaCl}_2$  in MOPS buffer (1.0 mL) and NaF in water (appropriate volume to obtain the desired  $[\text{F}^-]$  concentration) are mixed, and the volume is completed to 2.0 mL with bidistilled water. The concentrations are  $[\text{Ca}^{2+}] = 2.5 \text{ mM}$ ,  $[\text{MOPS}] = 50.0 \text{ mM}$ , and  $[\text{F}^-]$  depends on the volume of NaF that was added. Solid  $\text{CaF}_2$  (10 mg) is added to initiate precipitation, the mixture is vigorously shaken, and left to equilibrate at room temperature for at least 2 hours.

*Step 2 :* The solution is filtered through a 0.2  $\mu\text{M}$  membrane filter (Exapure<sup>™</sup>). An aliquot (1.0 mL) is poured into 1.0 mL of the BAPTA stock solution in MOPS. The mixture is immediately ready for fluorescence measurements ( $\lambda_{\text{ex}} = 316 \text{ nm}$ ). The final concentrations are  $[\text{BAPTA}] = 1.25 \text{ mM}$ ,  $[\text{MOPS}] = 75.0 \text{ mM}$ ,  $[\text{Ca}^{2+}] \leq 1.25 \text{ mM}$ .

The fluorescence spectra obtained with different quantities of NaF stock solution added in *Step 1* are shown in Fig. S1 and Fig. 1. The results shown in Fig. 1 are used as calibration curve to determine fluoride content of dental care products (see points 3 and 4).

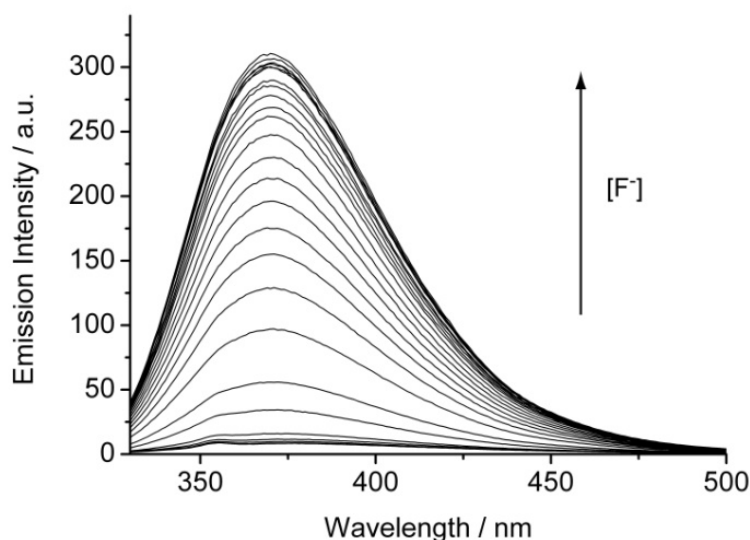

**Fig. S1** Fluorescence emission spectra ( $\lambda_{\text{ex}} = 316 \text{ nm}$ ) for solutions containing different amounts of fluoride. The assays were performed as described in the main text. The data were obtained at 25 °C in H<sub>2</sub>O (pH 7.0, 75 mM MOPS buffer). The curves represent averages of three independent measurements.

### 3. Procedure for the detection of various anions in water :

*Step 1* : Stock solutions of CaCl<sub>2</sub> in MOPS buffer (1.0 mL) and Na<sub>*n*</sub>X in water (100 μL) are mixed, and the volume is completed to 2.0 mL with bidistilled water. The concentrations are [Ca<sup>2+</sup>] = 2.5 mM, [MOPS] = 50.0 mM, and [X<sup>*n*-</sup>] = 5.0 mM. Solid CaF<sub>2</sub> (10 mg) is added, the mixture is vigorously shaken, and left to equilibrate at room temperature for at least 2 hours.

*Step 2* : Performed in the same way as in point 2.

### 4. Procedure for the detection of fluoride in mouthwashes :

*Step 1* : Stock solution of CaCl<sub>2</sub> in MOPS buffer (1.0 mL) and mouthwash (200 μL) are mixed, and the volume is completed to 2.0 mL with bidistilled water. The concentrations are [Ca<sup>2+</sup>] = 2.5 mM, and [MOPS] = 50.0 mM, and the mixture contains 10% (v/v) of mouthwash. Solid CaF<sub>2</sub> (10 mg) is added to initiate precipitation, the mixture is vigorously shaken, and left to equilibrate at room temperature for at least 2 hours.

*Step 2* : Performed in the same way as in 2.

The obtained fluorescence spectra ( $\lambda_{\text{ex}} = 316 \text{ nm}$ ,  $\lambda_{\text{em}} = 370 \text{ nm}$ ) are compared to the results shown in Fig. 1 to determine the fluoride content of the solution prepared in *Step 1*, and of the mouthwash sample.

### 5. Procedure for the detection of fluoride in toothpastes :

*Step 1* : 40 mg toothpaste are weighted in a small vial. Stock solution of  $\text{CaCl}_2$  in MOPS buffer (1.0 mL) and bidistilled water (1.0 mL) are added. The concentrations are  $[\text{Ca}^{2+}] = 2.5 \text{ mM}$ , and  $[\text{MOPS}] = 50.0 \text{ mM}$ . Solid  $\text{CaF}_2$  (10 mg) is added. The mixture is vigorously shaken, sonicated at  $50 \text{ }^\circ\text{C}$  for 15 minutes, and left to equilibrate at room temperature for at least 2 hours.

*Step 2* : Performed in the same way as in 2.

The obtained fluorescence spectra ( $\lambda_{\text{ex}} = 316 \text{ nm}$ ,  $\lambda_{\text{em}} = 370 \text{ nm}$ ) are compared to the results shown in Fig. 1 to determine the fluoride content of the solution prepared in *Step 1*, and of the toothpaste sample.

Note : Toothpastes contain various amounts of water, which were determined as follows : a given quantity of each toothpaste was weighted in a vial, and stored in an oven at  $110 \text{ }^\circ\text{C}$  for 24 hours. By weighting the samples after drying, the water content can be determined :

| Sample          | % water (w/w) |
|-----------------|---------------|
| BHF             | 37            |
| Elmex Green     | 55            |
| Elmex for kids  | 64            |
| Meridol         | 45            |
| Signal for kids | 35            |

These values imply that the volume of the solution obtained after *Step 1* is not strictly 2.0 mL, but slightly higher. The correction was applied when calculating the concentration of fluoride in the sample.
